# Supplementary material
Source: PubMed Central journal article supplement (PMC5503765)
Supplement: NIHMS857173-supplement-supplement_1.pdf [file NIHMS857173-supplement-supplement_1.pdf]

SUPPLEMENTAL TABLE 1: ICD-9 Codes Utilized to Diagnose Meningitis and/or Encephalitis

|        |                                                                                                                                                                                     |
|--------|-------------------------------------------------------------------------------------------------------------------------------------------------------------------------------------|
| 013.60 | Tuberculous encephalitis or myelitis unspecified examination                                                                                                                        |
| 013.61 | Tuberculous encephalitis or myelitis bacteriological or histological examination not done                                                                                           |
| 013.62 | Tuberculous encephalitis or myelitis bacteriological or histological examination results unknown (at present)                                                                       |
| 013.63 | Tuberculous encephalitis or myelitis tubercle bacilli found (in sputum) by microscopy                                                                                               |
| 013.64 | Tuberculous encephalitis or myelitis tubercle bacilli not found (in sputum) by microscopy but found by bacterial culture                                                            |
| 013.65 | Tuberculous encephalitis or myelitis tubercle bacilli not found by bacteriological examination but tuberculosis confirmed histologically                                            |
| 013.66 | Tuberculous encephalitis or myelitis tubercle bacilli not found by bacteriological or histological examination but tuberculosis confirmed by other methods (inoculation of animals) |
| 036.1  | Meningococcal encephalitis                                                                                                                                                          |
| 052.0  | Postvaricella encephalitis                                                                                                                                                          |
| 055.0  | Postmeasles encephalitis                                                                                                                                                            |
| 058.21 | Human herpesvirus 6 encephalitis                                                                                                                                                    |
| 058.29 | Other human herpesvirus encephalitis                                                                                                                                                |
| 062.0  | Japanese encephalitis                                                                                                                                                               |
| 062.1  | Western equine encephalitis                                                                                                                                                         |
| 062.2  | Eastern equine encephalitis                                                                                                                                                         |
| 062.3  | St. Louis encephalitis                                                                                                                                                              |
| 062.4  | Australian encephalitis                                                                                                                                                             |
| 062.5  | California virus encephalitis                                                                                                                                                       |
| 062.8  | Other specified mosquito-borne viral encephalitis                                                                                                                                   |
| 062.9  | Mosquito-borne viral encephalitis unspecified                                                                                                                                       |
| 063.0  | Russian spring-summer (taiga) encephalitis                                                                                                                                          |
| 063.2  | Central european encephalitis                                                                                                                                                       |
| 063.8  | Other specified tick-borne viral encephalitis                                                                                                                                       |
| 063.9  | Tick-borne viral encephalitis unspecified                                                                                                                                           |
| 064    | Viral encephalitis transmitted by other and unspecified arthropods                                                                                                                  |
| 066.41 | West Nile fever with encephalitis                                                                                                                                                   |
| 072.2  | Mumps encephalitis                                                                                                                                                                  |
| 090.41 | Congenital syphilitic encephalitis                                                                                                                                                  |
| 094.81 | Syphilitic encephalitis                                                                                                                                                             |

|        |                                                                                                                                                                       |
|--------|-----------------------------------------------------------------------------------------------------------------------------------------------------------------------|
| 139.0  | Late effects of viral encephalitis                                                                                                                                    |
| 323.01 | Encephalitis and encephalomyelitis in viral diseases classified elsewhere                                                                                             |
| 323.1  | Encephalitis, myelitis, and encephalomyelitis in rickettsial diseases classified elsewhere                                                                            |
| 323.2  | Encephalitis, myelitis, and encephalomyelitis in protozoal diseases classified elsewhere                                                                              |
| 323.41 | Other encephalitis and encephalomyelitis due to other infections classified elsewhere                                                                                 |
| 323.51 | Encephalitis and encephalomyelitis following immunization procedures                                                                                                  |
| 323.62 | Other postinfectious encephalitis and encephalomyelitis                                                                                                               |
| 323.71 | Toxic encephalitis and encephalomyelitis                                                                                                                              |
| 323.81 | Other causes of encephalitis and encephalomyelitis                                                                                                                    |
| 323.9  | Unspecified causes of encephalitis, myelitis, and encephalomyelitis                                                                                                   |
| V05.0  | Need for prophylactic vaccination and inoculation against arthropod-borne viral encephalitis                                                                          |
| 003.21 | Salmonella meningitis                                                                                                                                                 |
| 013.00 | Tuberculous meningitis unspecified examination                                                                                                                        |
| 013.01 | Tuberculous meningitis bacteriological or histological examination not done                                                                                           |
| 013.02 | Tuberculous meningitis bacteriological or histological examination results unknown (at present)                                                                       |
| 013.03 | Tuberculous meningitis tubercle bacilli found (in sputum) by microscopy                                                                                               |
| 013.04 | Tuberculous meningitis tubercle bacilli not found (in sputum) by microscopy but found by bacterial culture                                                            |
| 013.05 | Tuberculous meningitis tubercle bacilli not found by bacteriological examination but tuberculosis confirmed histologically                                            |
| 013.06 | Tuberculous meningitis tubercle bacilli not found by bacteriological or histological examination but tuberculosis confirmed by other methods (inoculation of animals) |
| 036.0  | Meningococcal meningitis                                                                                                                                              |
| 047.0  | Meningitis due to coxsackie virus                                                                                                                                     |
| 047.1  | Meningitis due to echo virus                                                                                                                                          |
| 047.8  | Other specified viral meningitis                                                                                                                                      |
| 047.9  | Unspecified viral meningitis                                                                                                                                          |
| 049.1  | Non-arthropod borne meningitis due to adenovirus                                                                                                                      |
| 053.0  | Herpes zoster with meningitis                                                                                                                                         |
| 054.72 | Herpes simplex meningitis                                                                                                                                             |
| 072.1  | Mumps meningitis                                                                                                                                                      |
| 090.42 | Congenital syphilitic meningitis                                                                                                                                      |
| 091.81 | Acute syphilitic meningitis (secondary)                                                                                                                               |

|        |                                                                     |
|--------|---------------------------------------------------------------------|
| 094.2  | Syphilitic meningitis                                               |
| 098.82 | Gonococcal meningitis                                               |
| 100.81 | Leptospiral meningitis (aseptic)                                    |
| 112.83 | Candidal meningitis                                                 |
| 114.2  | Coccidioidal meningitis                                             |
| 115.01 | Histoplasma capsulatum meningitis                                   |
| 115.11 | Histoplasma duboisii meningitis                                     |
| 115.91 | Histoplasmosis meningitis unspecified                               |
| 320.0  | Hemophilus meningitis                                               |
| 320.1  | Pneumococcal meningitis                                             |
| 320.2  | Streptococcal meningitis                                            |
| 320.3  | Staphylococcal meningitis                                           |
| 320.7  | Meningitis in other bacterial diseases classified elsewhere         |
| 320.81 | Anaerobic meningitis                                                |
| 320.82 | Meningitis due to gram-negative bacteria not elsewhere classified   |
| 320.89 | Meningitis due to other specified bacteria                          |
| 320.9  | Meningitis due to unspecified bacterium                             |
| 321.0  | Cryptococcal meningitis                                             |
| 321.1  | Meningitis in other fungal diseases                                 |
| 321.2  | Meningitis due to viruses not elsewhere classified                  |
| 321.3  | Meningitis due to trypanosomiasis                                   |
| 321.4  | Meningitis in sarcoidosis                                           |
| 321.8  | Meningitis due to other nonbacterial organisms classified elsewhere |
| 322.0  | Nonpyogenic meningitis                                              |
| 322.1  | Eosinophilic meningitis                                             |
| 322.2  | Chronic meningitis                                                  |
| 322.9  | Meningitis unspecified                                              |
